# Supplementary material for: Benchmarking multimodel terrestrial water storage seasonal cycle against GRACE observations over major global river basins
Source: Copernicus journal article supplement (doi:10.5194/hess-2023-163), 2023-07-25
Supplement: Supplementary file 1 [file hess-2023-163-supplement.pdf]

## List of abbreviations

|             |                                                                |
|-------------|----------------------------------------------------------------|
| TWS         | Terrestrial Water Storage                                      |
| GRACE       | Gravity recovery and climate experiment                        |
| GHMs        | Global hydrological models                                     |
| LSMs        | Land Surface Models                                            |
| CSR-M       | University of Texas Center for Space Research mascon solutions |
| JPL-M       | Jet Propulsion Laboratory mascon solutions                     |
| WRR1        | Water Resources Reanalysis 1 and 2                             |
| WRR2        |                                                                |
| E2O         | earth2Observe                                                  |
| EU-FP7      | European Union's Seventh Framework Programme                   |
| WATCH       | WATER and global CHange                                        |
| WFDEI       | WATCH Forcing Data applied to the ERA-Interim data             |
| MSWEP       | Multi-Source Weighted Ensemble Precipitation                   |
| LISFLOOD    | -                                                              |
| HBV-SIMREG  | -                                                              |
| W3RA        | Worldwide water Resources Assessment                           |
| SWABM       | Simple Water Balance Model                                     |
| WaterGAP3   | Water – Global Assessment and Prognosis-3                      |
| HTESSEL     | Hydrology Tiled ECMWF Scheme for Surface Exchanges over Land   |
| JULES       | Joint UK Land Environment Simulator                            |
| Surfex-Trip | Surface Externalisée-Trip                                      |

**Table S1: Models overview and key changes from WRR1 to WRR2**

|   | Model       | Organization                                               | Model Type | Evaporation                          | Runoff                             | Changes in WRR2                                                                                                                                                                  | References                             |
|---|-------------|------------------------------------------------------------|------------|--------------------------------------|------------------------------------|----------------------------------------------------------------------------------------------------------------------------------------------------------------------------------|----------------------------------------|
| 1 | HBV-SIMREG  | Joint Research Centre (JRC) GHM                            | GHM        | Penman 1948                          | Beta function                      | n/a                                                                                                                                                                              | Lindström et al. (1997)                |
| 2 | LISFLOOD    | Joint Research Centre (JRC)                                | GHM        | Penman 1948                          | Saturation and infiltration excess | Improved soil layers, and groundwater abstraction                                                                                                                                | Van Der Knijff et al. (2010)           |
| 3 | PCR-GLOBWB  | Universiteit Utrecht (UU)                                  | GHM        | Hamon (tier 1) or imposed as forcing | Saturation and infiltration excess | Improved river routing and reservoir system, incorporated water consumption and groundwater abstraction                                                                          | Van Beek et al. (2011)                 |
| 4 | SWBM        | Eidgenössische Technische Hochschule (ETH)                 | GHM        | Inferred from net radiation          | Saturation and infiltration excess | n/a                                                                                                                                                                              | Orth and Seneviratne (2013)            |
| 5 | W3RA        | Eidgenössische Technische Hochschule (ETH)                 | GHM        | Penman 1948                          |                                    | Revised groundwater hydrology and soil equation incorporates enhanced parameter estimation, dynamic data assimilation, and water evapotranspiration not resulting from rainfall. | Van Dijk et al. (2014)                 |
| 6 | WaterGAP3   | Universität Kassel                                         | GHM        | Priestley-Taylor                     | Beta function                      | Integration of soil water evaluations and reservoir monitoring                                                                                                                   | Flörke et al. (2013)                   |
| 7 | HTESSEL     | European Centre for Medium-Range Weather Forecasts (ECMWF) | LSM        | Penman 1948                          | Saturation excess                  | Multilayer soil scheme, increased number of soil layers                                                                                                                          | Balsamo et al. (2009)                  |
| 8 | JULES       | Centre for Ecology and Hydrology (CEH)                     | LSM        | Penman 1948                          | Saturation and infiltration excess | Rainfall runoff dynamics, incorporating topographic gradient reliance in a saturated overflow discharge scheme                                                                   | Best et al. (2011) Clark et al. (2011) |
| 9 | SURFEX-Trip | Metro France                                               | LSM        | Penman 1948                          | Saturation and infiltration excess | Improved groundwater. Land use, flood plains, snow and surface energy and plant growth                                                                                           | Decharme et al. (2010)                 |

\* Schellekens et al. (2017)

## Correlation coefficient (R)

The correlation coefficient (R) is the frequently used statistic to quantify the patterns of similarity between two variables (f) and (r) which are defined at N discrete points (in time and/or space).

$$R = \frac{\frac{1}{N} \sum_{n=1}^N (f_n - \bar{f})(r_n - \bar{r})}{\sigma_f \sigma_r} \quad (3)$$

where  $\bar{f}$  and  $\bar{r}$  are the mean values and  $\sigma_f$  and  $\sigma_r$  are the standard deviations of “f” and “r”, respectively.

R reaches to 1 (maximum value) when for all n,  $(f_n - \bar{f}) = \alpha(r_n - \bar{r})$ , where  $\alpha$  is a positive constant. In this instance, the two fields are not equal unless  $\alpha = 1$ , despite sharing the same centered pattern of variation. Therefore, it is unlikely that the two models have the same amplitude of variance as R alone.

## RMS difference (E)

RMS is the most frequently used statistic to quantify differences between two fields (f and r) and is defined by

$$E = \frac{1}{N} \sum_{n=1}^N [(f_n - \bar{f}) - (r_n - \bar{r})]^2 \quad (4)$$

The standard deviation of “f” ( $\sigma_f$ ) is defined as following

$$E = \frac{1}{N} \sum_{n=1}^N (f_n - \bar{f})^2 \quad (5)$$

And of “r” ( $\sigma_r$ ) is

$$E = \frac{1}{N} \sum_{n=1}^N (r_n - \bar{r})^2 \quad (6)$$

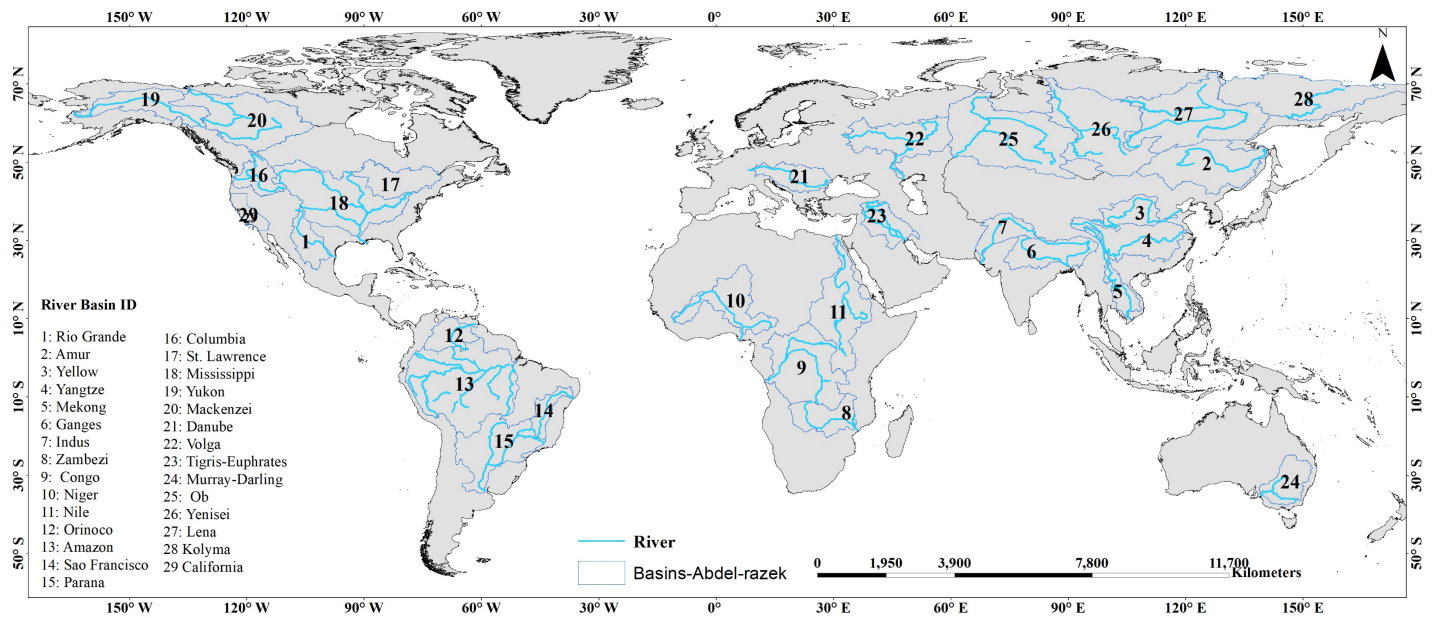

**Figure S1:** Selected 29 major global river basins.

Nine river basins including Amur (2), Saint Lawrence (17), Yukon (19), Mackenzie (20), Volga (22), Ob (25), Yenisei (26), Lena (27), and Kolyma (28) were selected from the boreal zone. Among them, five basins (i.e., Yukon, Mackenzie, Yenisei, Lena, and Kolyma) have heterogeneous climate conditions from polar to boreal and one basin (i.e., Saint Lawrence) is in boreal to temperate zones. Eleven river basins in the temperate zone were selected. Out of these, three basins i.e., Columbia (16), Mississippi (18), and the Danube (21) are located in the cold to temperate zone, and four basins i.e., Rio Grande (1), Euphrates (23), Murray-Darling (24), and California (29) in temperate to arid zone while four river basins Yellow River (3), Yangtze (4), Brahmaputra-Ganga (6), Indus (7) shares polar to the temperate and arid climate. Five basins, including Zambezi (8), Niger (10), Nile (11), São Francisco (14), and Prana (15), were selected from the arid zone and four major river basins in the tropical zone, including Mekong (5), Congo (9), Orinoco (12), and Amazon (13).

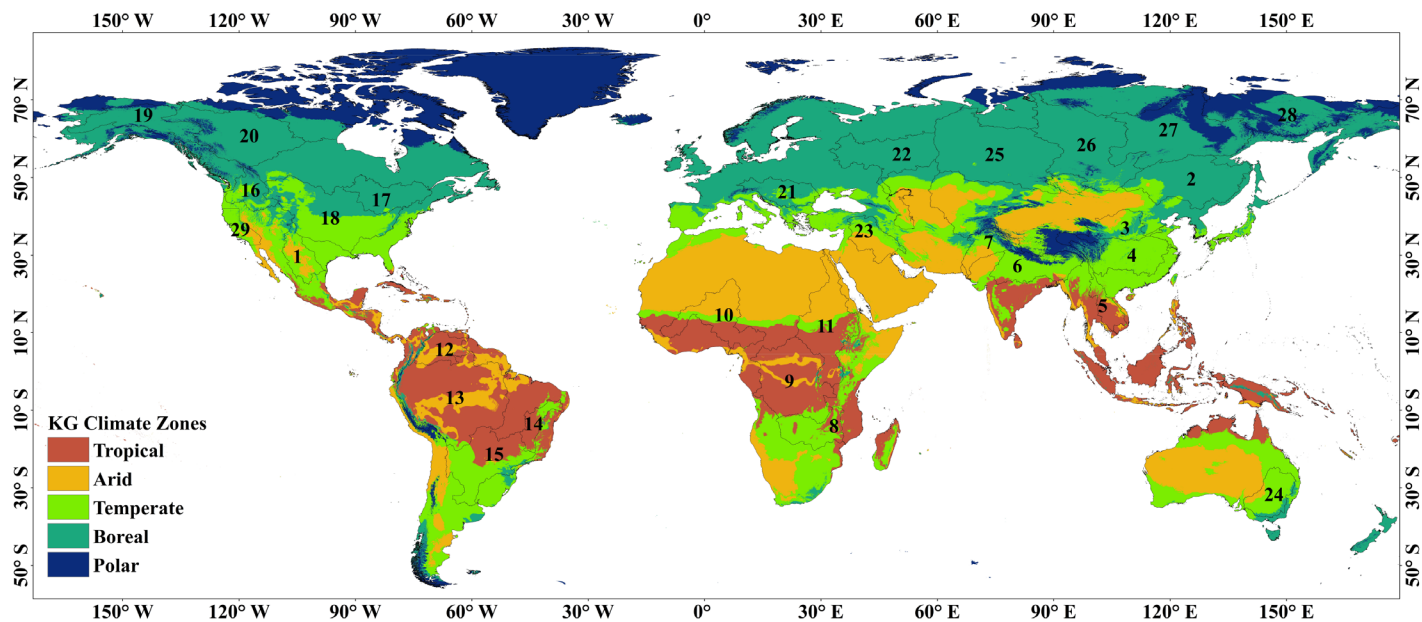

**Figure S2: KGClim Climate Zones (1983-2013) classification**

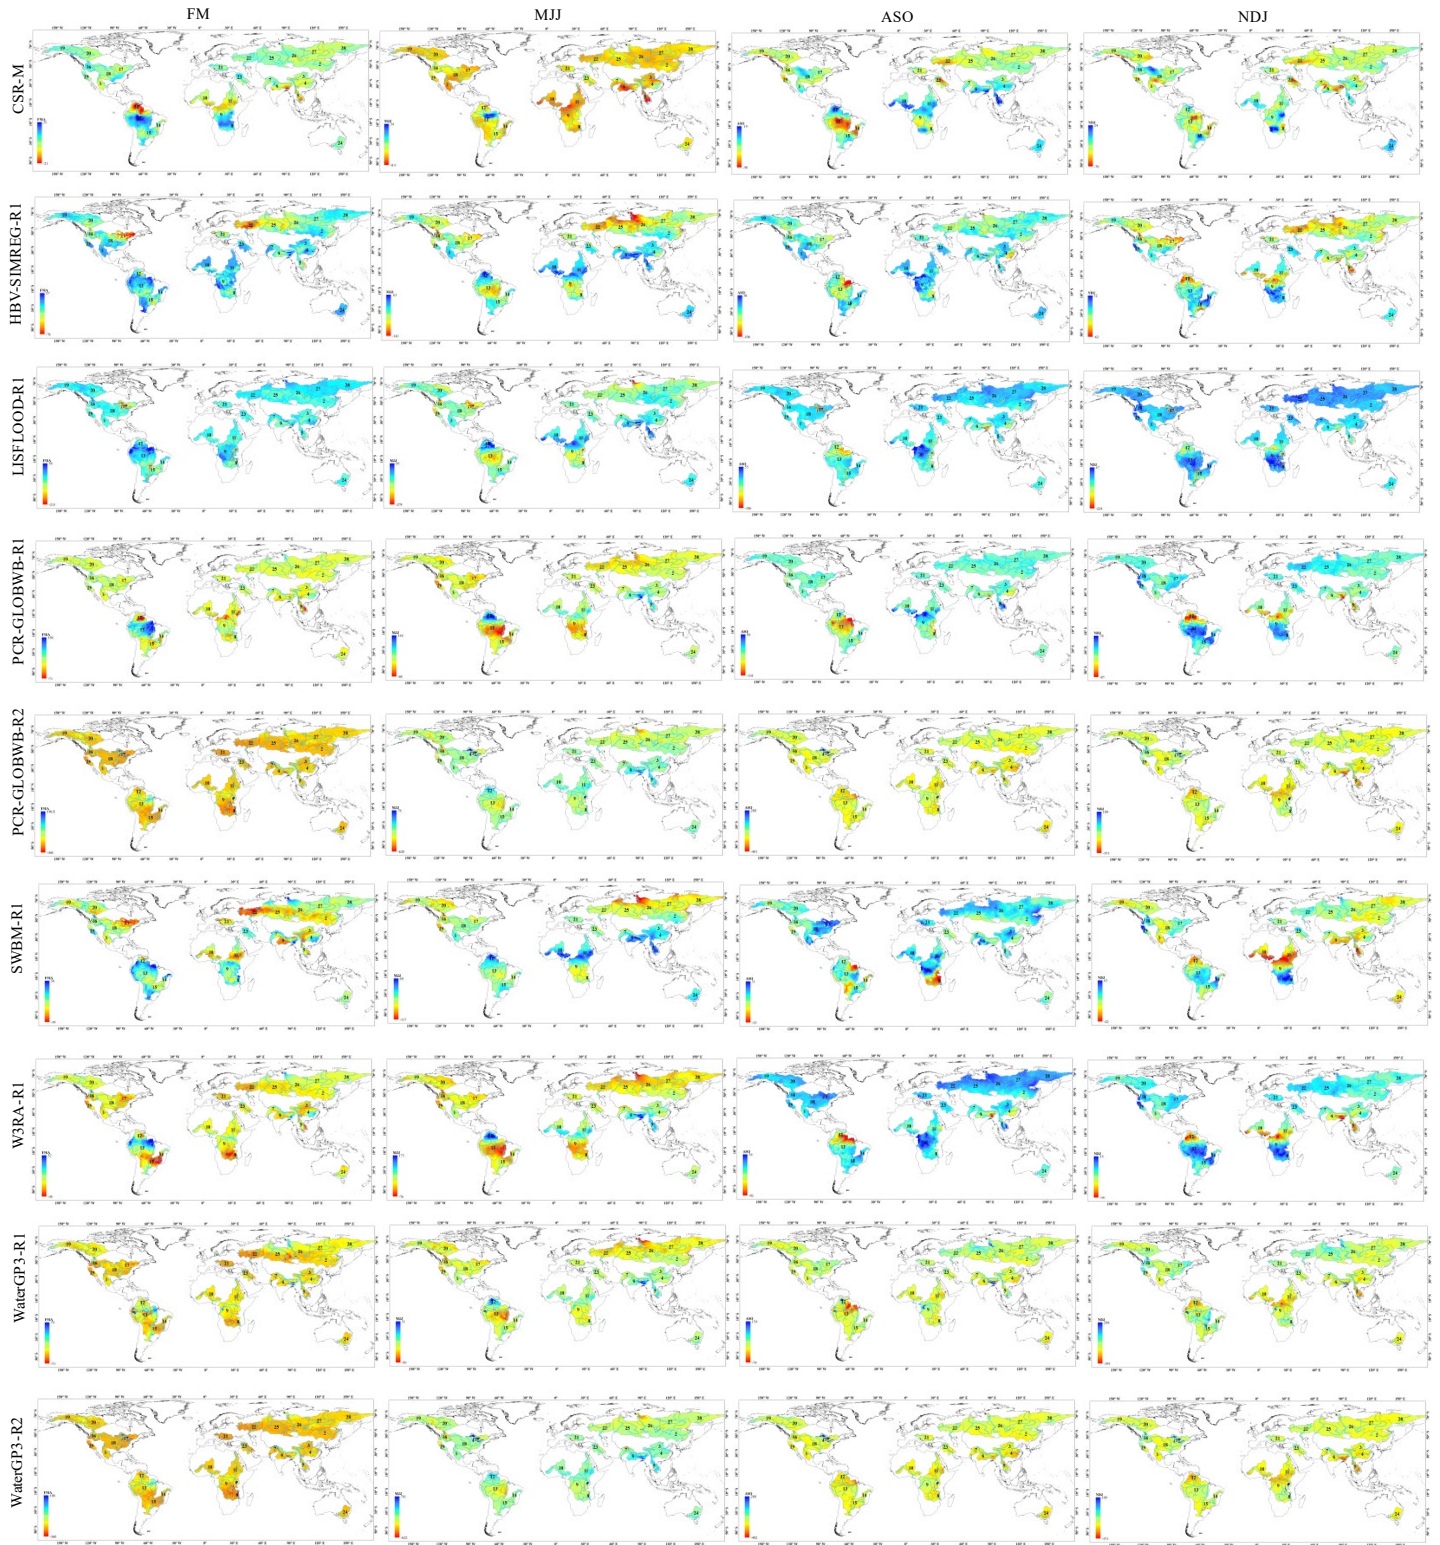

**Figure S3:** Seasonal maps for GRACE CSR-M and GHM R1 and R2

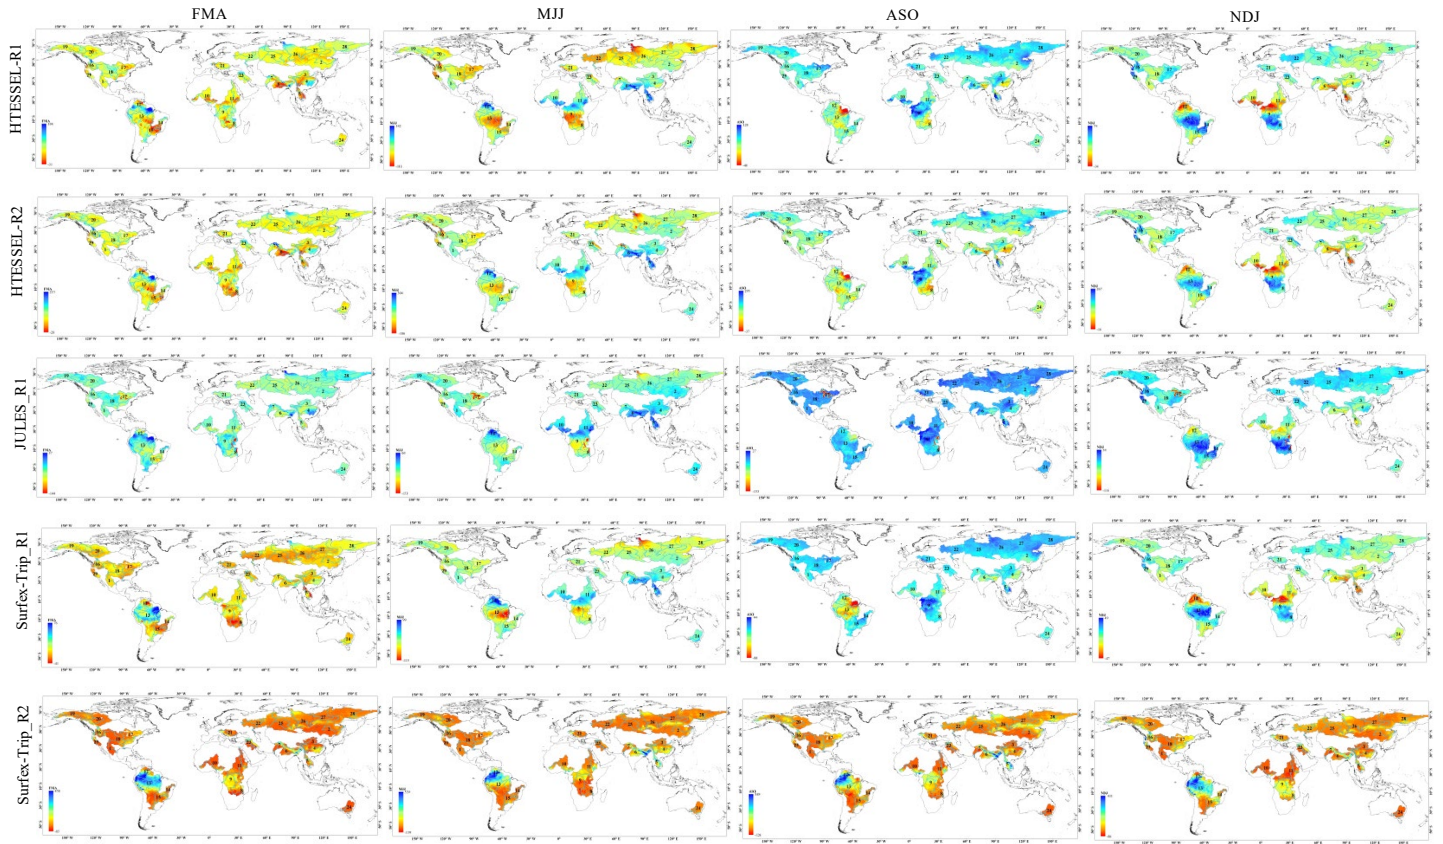

**Figure S4:** Seasonal maps of LSM R1 and R2

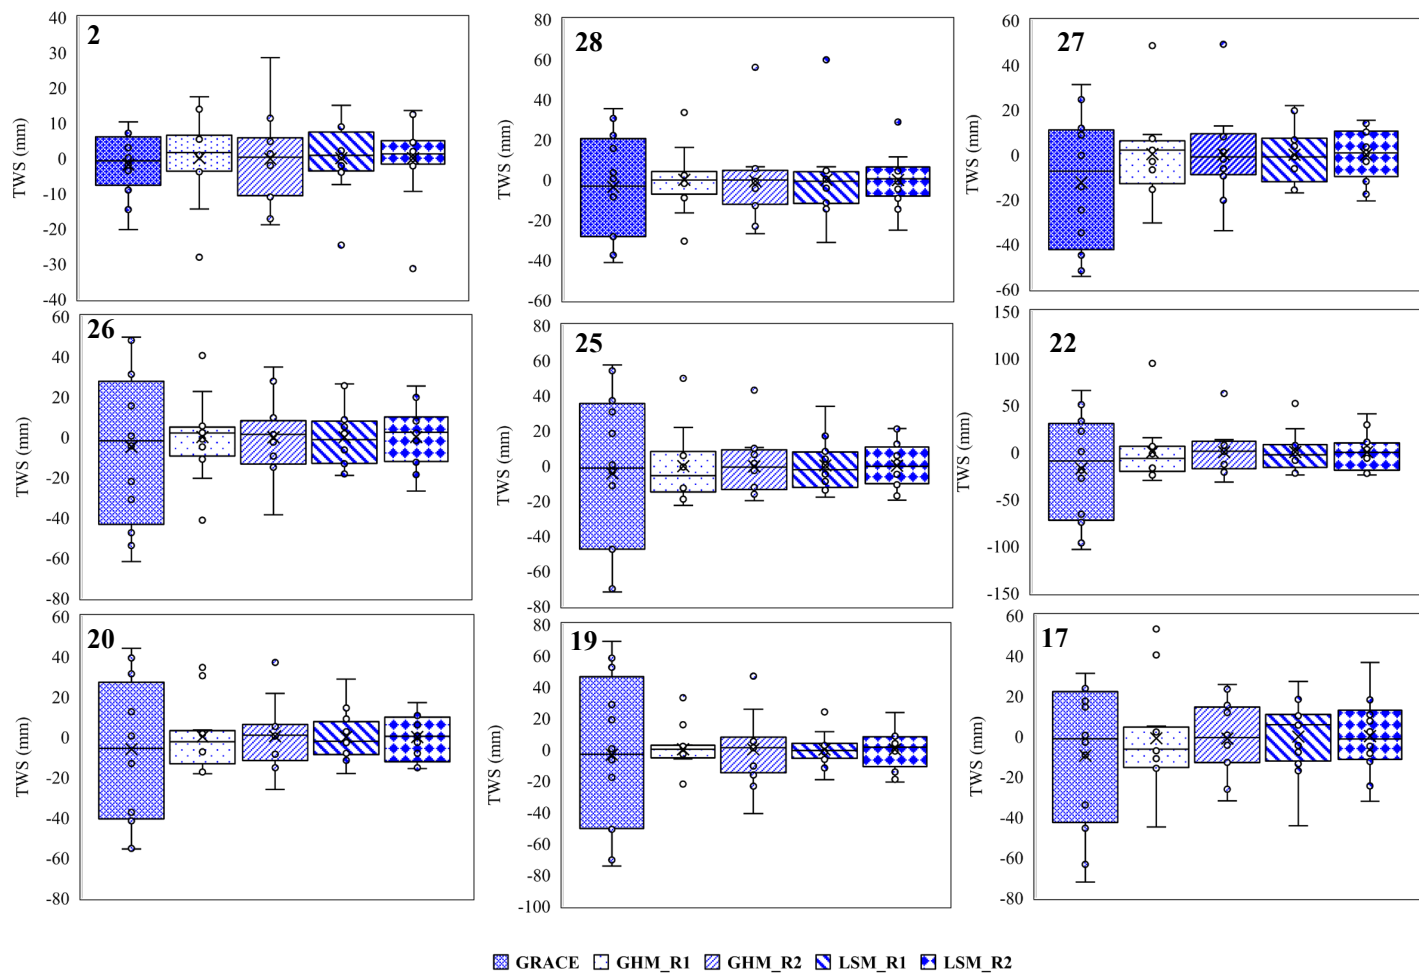

**Figure S5:** Distribution of GRACE and grouped model type (GHM or LSM) and forcing resolution (R1 and R2) in the Boreal zone.



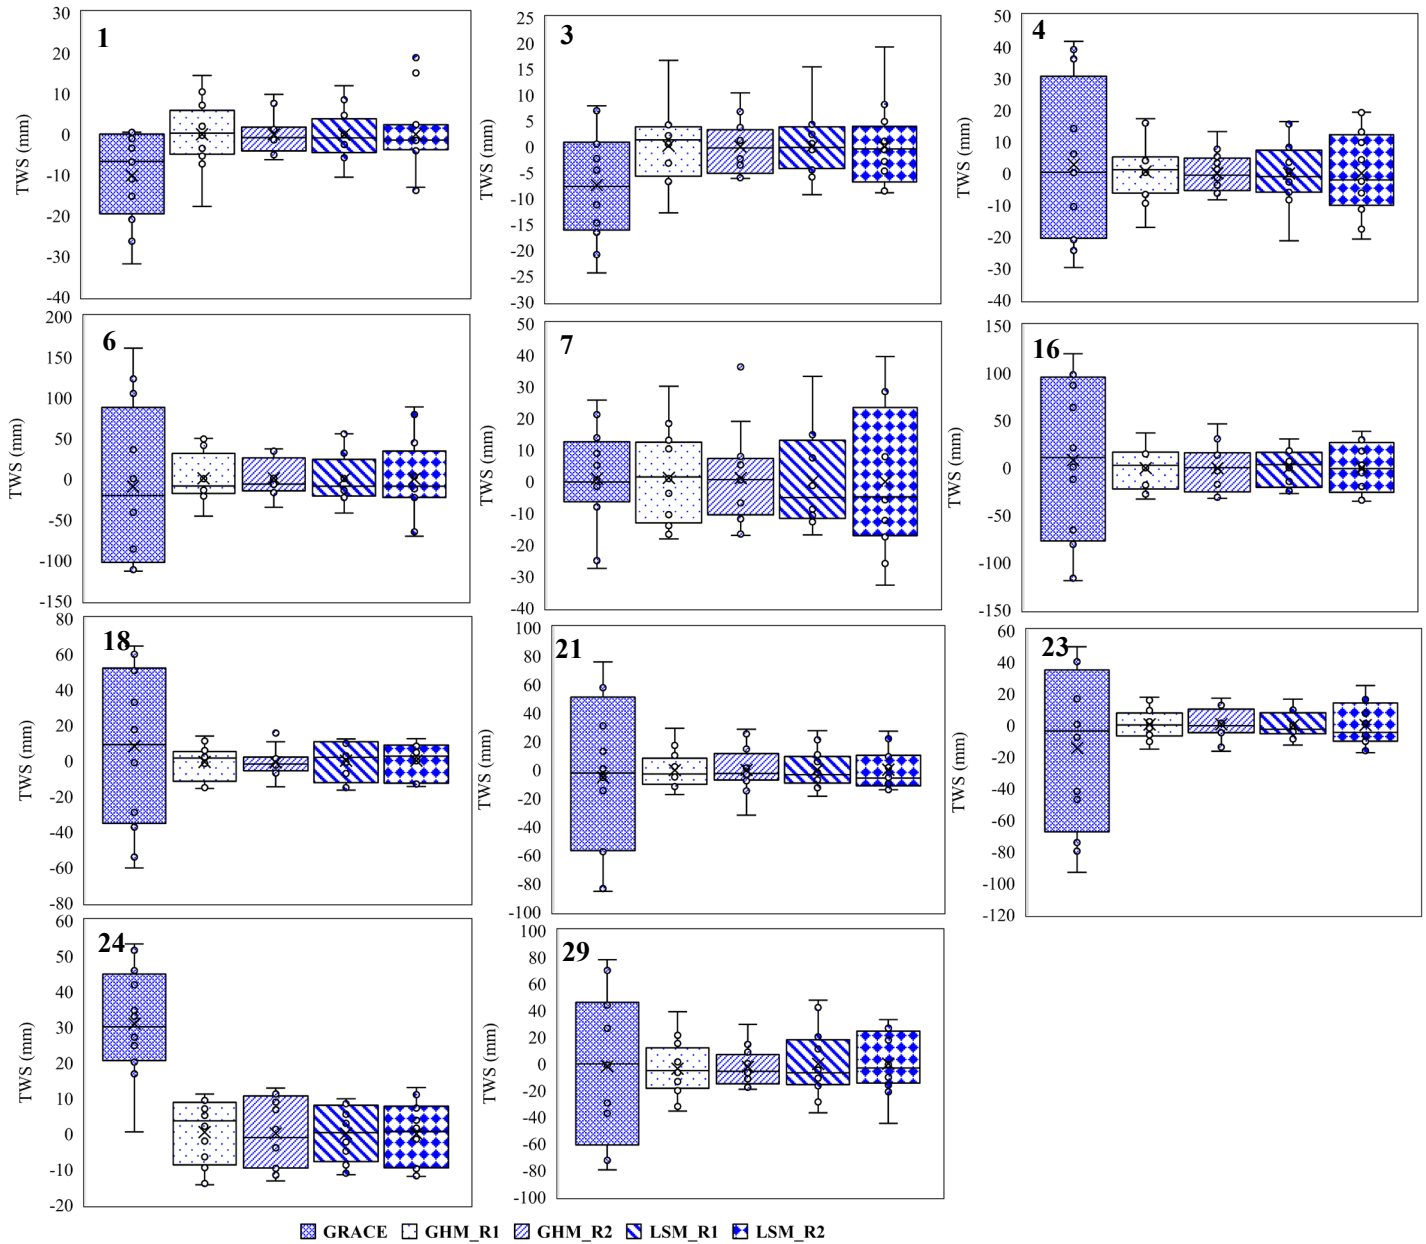

**Figure S6:** Distribution of GRACE and grouped model type (GHM or LSM) and forcing resolution (R1 and R2) in the Temperate zone.

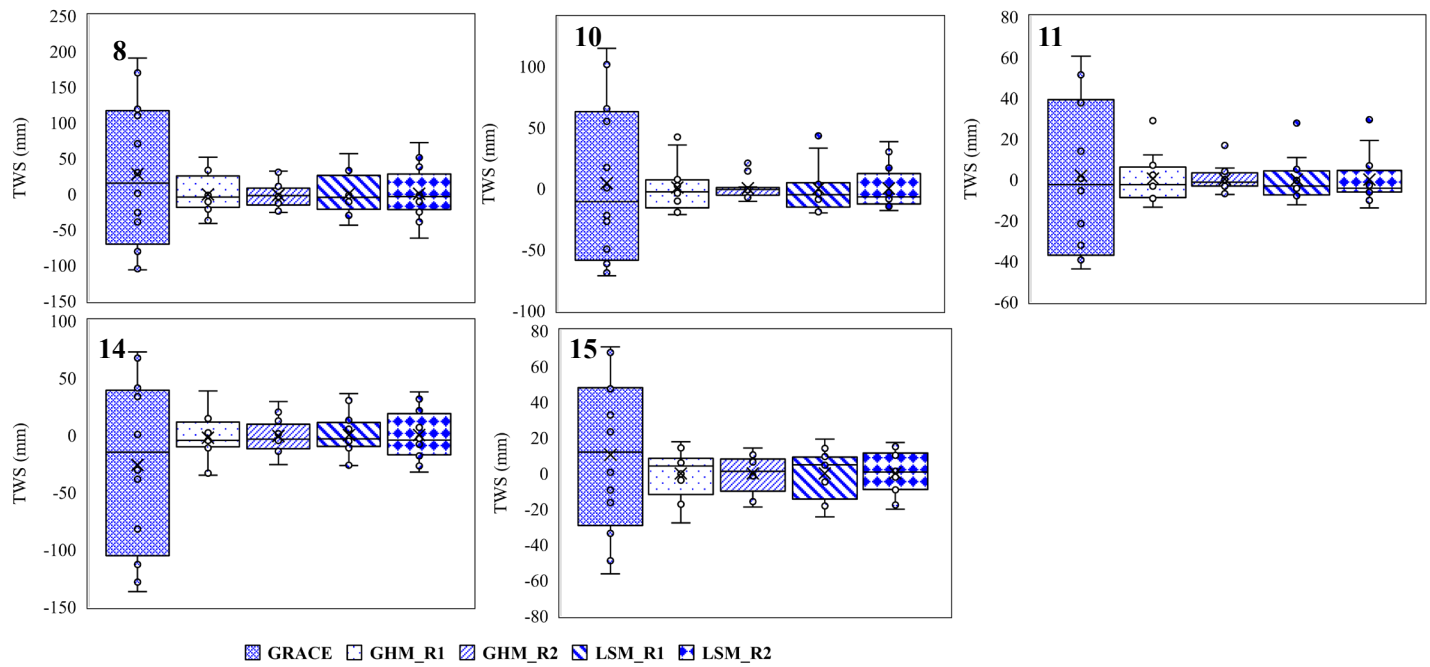

**Figure S7:** Distribution of GRACE and grouped model type (GHM or LSM) and forcing resolution (R1 and R2) in the Arid zone.

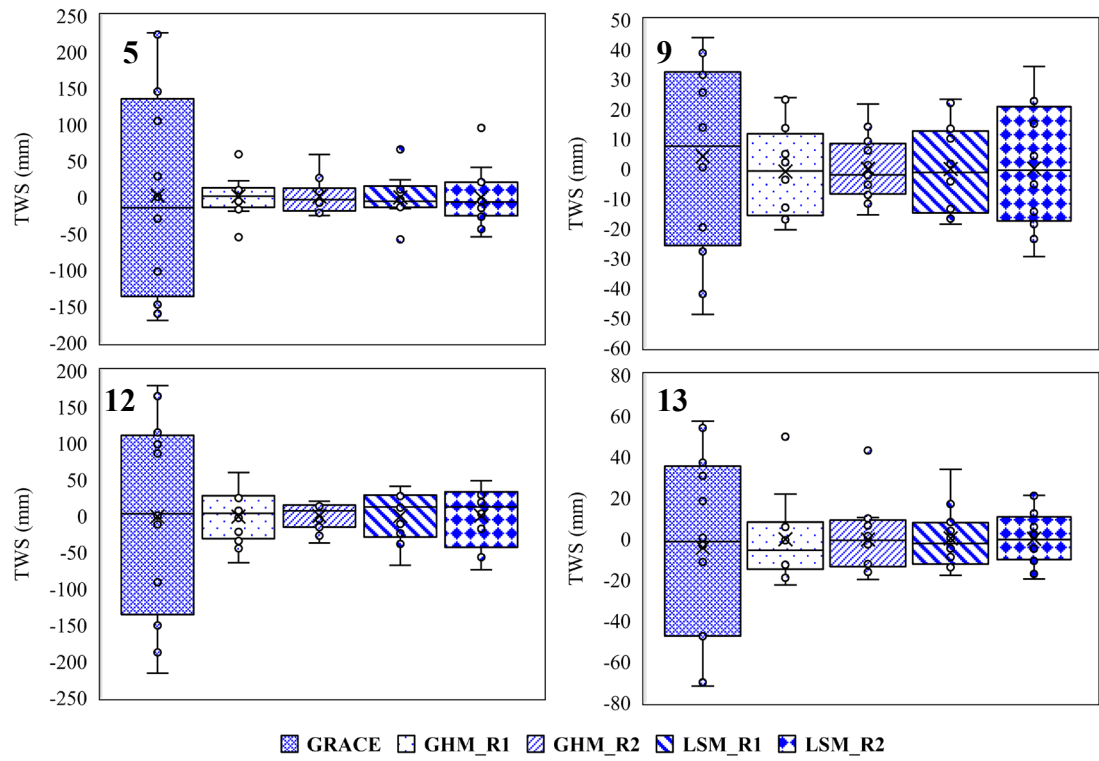

**Figure S8:** Distribution of GRACE and grouped model type (GHM or LSM) and forcing resolution (R1 and R2) in the Tropical zone.
